# Supplementary material for: Soil organic carbon pools and carbon management index under different land use systems in North western Himalayas
Source: PeerJ. 2023 Jun 6;11:e15266. doi: 10.7717/peerj.15266 (PMC10252814; doi:10.7717/peerj.15266)
Supplement: Data S1 [file peerj-11-15266-s001.xlsx]

## Sheet: Sheet1
	TOC (Mg ha-1)					WBC (gkg-1)					LOC (gkg-1)					POC (mgkg-1)					MBC (mgkg-1)					Sand (%)					Silt (%)					Clay (%)					BD (Mgm-3)					pH
Land Use	Rep 1	Rep 2	Rep 3	Mean		Rep 1	Rep 2	Rep 3	Mean		Rep 1	Rep 2	Rep 3	Mean		Rep 1	Rep 2	Rep 3	Mean		Rep 1	Rep 2	Rep 3	Mean		Rep 1	Rep 2	Rep 3	Mean		Rep 1	Rep 2	Rep 3	Mean		Rep 1	Rep 2	Rep 3	Mean		Rep 1	Rep 2	Rep 3	Mean		Rep 1	Rep 2	Rep 3	Mean
Forest D1	65.04	64.86	63.06	64.32		22.2	22	21.8	22		7.44	7.72	6.44	7.2		1497.16	1345.3	1298.27	1380.24		1524.25	1434.56	1415.55	1458.12		52.1	54.4	56.1	54.2		36.3	35.6	30.7	34.2		11.6	10	13.2	11.6		1.29	1.1	1.15	1.18		6.2	5.9	6.3	6.13333
Forest D2	57.21	55.32	54.45	55.66		17.9	19	19.7	18.8667		4.75	4.79	4.68	4.74		1152.15	1112.23	1101.96	1122.11		1241.16	1235.65	1220.77	1232.53		49.4	50.2	51.3	50.3		37.1	35.7	33.5	35.4333		13.5	14.1	15.2	14.2667		1.31	1.17	1.28	1.25333		6.4	6.2	6.5	6.36667
Forest D3	46.11	44.63	42.89	44.5433		15.4	17.1	16.6	16.3667		3.29	3.31	3.24	3.28		983.45	969.67	960.21	971.11		1009.2	1003.53	999.68	1004.14		45.6	46.4	47.1	46.3667		39.2	36.8	34.7	36.9		15.2	16.8	18.2	16.7333		1.35	1.26	1.32	1.31		7.1	7.4	7.5	7.33333
Pasture D1	59.56	59.78	58.66	59.3333		16.12	17.9	16.7	16.9067		7.37	6.86	6.24	6.82333		1298.48	1347.16	1225.38	1290.34		1367.58	1187.95	991.91	1182.48		45.3	46.5	47.7	46.5		40.5	39.7	36.8	39		14.2	13.8	15.5	14.5		1.27	1.23	1.19	1.23		6.3	6.5	6.4	6.4
Pasture D2	52.98	53.22	51.55	52.5833		15.6	14.1	14.5	14.7333		4.43	3.91	3.83	4.05667		1089.65	1102.1	1082.34	1091.36		1401.12	1201.17	1001.23	1201.17		41.6	45.2	44.1	43.6333		40.6	40.3	38.2	39.7		17.8	14.5	17.7	16.6667		1.32	1.28	1.25	1.28333		6.4	6.6	6.5	6.5
Pasture D3	42.13	43.14	41.15	42.14		14.4	12.7	12.9	13.3333		3.09	3.01	2.92	3.00667		898.59	902.48	881.36	894.143		1342.27	1179.45	986.48	1169.4		37.6	41	40.2	39.6		42.2	42	40.3	41.5		20.2	17	19.5	18.9		1.39	1.33	1.31	1.34333		7.3	7.4	7.5	7.4
Apple 1	48.62	48.14	47.87	48.21		16.98	16.85	16.76	16.8633		5.1	4.44	4.33	4.62333		904.49	928.74	898.32	910.517		1102.59	932.47	768.67	934.577		29.9	27	25.1	27.3333		50	50.6	51	50.5333		20.1	22.4	23.9	22.1333		1.22	1.28	1.27	1.25667		6.3	6.6	6.4	6.43333
Apple 2	40.16	39.96	39.78	39.9667		13.3	15.7	12.9	13.9667		3.95	3.87	3.79	3.87		789.57	794.23	781.61	788.47		1132.74	937.99	779.97	950.233		26.5	25.2	23.9	25.2		51.2	50.9	51.3	51.1333		22.3	23.9	24.8	23.6667		1.27	1.31	1.29	1.29		6.5	6.6	6.6	6.56667
Apple 3	31.19	31.01	30.82	31.0067		11.6	12.1	11.5	11.7333		2.18	2.14	2.03	2.11667		693.51	698.44	687.43	693.127		1080.14	929.68	765.48	925.1		22.3	21.8	20.1	21.4		52.3	52.8	53.2	52.7667		25.4	25.4	26.7	25.8333		1.33	1.37	1.34	1.34667		7.4	7.6	7.3	7.43333
Saffron 1	41.7	41.59	40.56	41.2833		12.3	12.5	12.3	12.3667		3.62	4.24	3.12	3.66		898.61	864.49	848.23	870.443		996.13	705.19	517.51	739.61		33.5	30.1	28.8	30.8		36.2	36.4	33.9	35.5		30.3	33.5	37.3	33.7		1.34	1.29	1.33	1.32		7.07	7.05	7.14	7.08667
Saffron 2	31.25	30.52	30.09	30.62		12.1	11.3	11.1	11.5		3.14	3.45	2.88	3.15667		686.84	674.49	659.61	673.647		964.26	703.61	515.23	727.7		30.2	27.5	26.2	27.9667		37.7	38.3	35.1	37.0333		32.1	34.2	38.7	35		1.39	1.34	1.37	1.36667		7.2	7.1	7.4	7.23333
Saffron 3	22.65	21.51	21.03	21.73		11.5	10.3	10.6	10.8		2.01	2.16	1.99	2.05333		494.95	492.12	490.19	492.42		944.39	702.02	513.15	719.853		20.1	21.2	18.1	19.8		43.2	41.9	41.2	42.1		36.7	36.9	40.7	38.1		1.44	1.42	1.47	1.44333		7.5	7.3	7.6	7.46667
Paddy-oilseed 1	36.44	36.25	35.68	36.1233		12.1	11.7	11.3	11.7		2.33	2.45	2.2	2.32667		794.46	739.78	734.69	756.31		851.2	549.73	366.93	589.287		18.7	19.4	19.9	19.3333		49.1	50.9	46.3	48.7667		32.2	29.7	33.8	31.9		1.39	1.37	1.37	1.37667		7.2	7.1	7.2	7.16667
Paddy-oilseed 2	27.92	27.59	26.94	27.4833		11.3	12.1	11	11.4667		2.1	2.04	2.14	2.09333		571.79	568.57	566.99	569.117		834.3	546.65	365.96	582.303		16.3	17.4	17.6	17.1		49.8	51.3	47.7	49.6		33.9	31.3	34.7	33.3		1.45	1.4	1.42	1.42333		7.4	7.6	6.9	7.3
Paddy-oilseed 3	19.15	18.97	18.58	18.9		9.9	10.7	10.5	10.3667		1.97	1.86	1.75	1.86		393.34	390.22	388.66	390.74		805.14	545.77	363.62	571.51		15.6	15.5	15.3	15.4667		50.3	52.2	49.2	50.5667		34.1	32.3	35.5	33.9667		1.52	1.48	1.53	1.51		7.6	7.9	7	7.5
	CMI (Depth 1)					CMI (Depth 2)					CMI (Depth 3)
Land Use	LC	LI	CPI	CMI		LC	LI	CPI	CMI		LC	LI	CPI	CMI
Forest	0.336921			100		0.235704	0.7	0.87	60.85		0.19759	0.59	0.7	40.81
Pasture	0.34689	1.03	0.93	95.46		0.208999	0.62	0.82	50.96		0.190295	0.56	0.66	37.19
Apple	0.27357	0.81	0.75	61.16		0.277022	0.82	0.62	51.34		0.180603	0.54	0.48	25.97
Saffron	0.2478	0.74	0.65	47.44		0.29943	0.89	0.48	42.52		0.267974	0.8	0.34	27
Paddy-oilseed	0.168841	0.5	0.56	28.29		0.205305	0.61	0.43	26.17		0.282675	0.84	0.3	24.79
	LC = Carbon Lability obtained by dividing Labile C of sample by non-labile C (difference between LOC and TOC)
	LI = Lability Index obtained by dividing Lability index of sample by Lability index of reference
